# Supplementary material for: Chromosome-level assemblies of multiple Arabidopsis genomes reveal hotspots of rearrangements with altered evolutionary dynamics
Source: PubMed Central journal article supplement (PMC7033125; doi:10.1038/s41467-020-14779-y), 2020-02-20
Supplement: 41467_2020_14779_MOESM1_ESM.pdf [file 41467_2020_14779_MOESM1_ESM.pdf]

**Chromosome-level assemblies of multiple *Arabidopsis* genomes reveal hotspots of rearrangements with altered evolutionary dynamics**

Jiao *et al.*

**Supplementary Table 1. Whole genome DNA sequencing data.**

| <b>Accession</b> |                     | <b>PacBio</b> |                    |              | <b>Illumina paired-end</b> |               |              |
|------------------|---------------------|---------------|--------------------|--------------|----------------------------|---------------|--------------|
|                  | <b>Stock number</b> | <b>Reads</b>  | <b>Mean Length</b> | <b>Depth</b> | <b>Pairs</b>               | <b>Length</b> | <b>Depth</b> |
| An-1             | N944                | 1,419,095     | 6,745              | 70           | 52,408,462                 | 101           | 78.4         |
| C24              | CS906               | 1,026,041     | 6,011              | 45           | 37,543,070                 | 101           | 56.2         |
| Cvi-0            | N8580               | 1,358,030     | 7,132              | 71           | 44,119,747                 | 101           | 66.0         |
| Eri-1            | CS22548             | 1,364,672     | 6,402              | 64           | 37,489,627                 | 101           | 56.1         |
| Ler              | N20                 | 1,312,624     | 7,140              | 69           | 48,030,713                 | 101           | 71.9         |
| Kyo              | JW10231             | 1,254,045     | 6,599              | 61           | 42,068,024                 | 101           | 62.9         |
| Sha              | CS929               | 853,955       | 8,281              | 52           | 50,271,422                 | 101           | 75.2         |

**Supplementary Table 2. Contig assembly statistics.**

|                    | <b>An-1</b> | <b>C24</b>  | <b>Cvi-0</b> | <b>Eri-1</b> | <b>Kyo</b>  | <b>Ler</b>  | <b>Sha</b>  |
|--------------------|-------------|-------------|--------------|--------------|-------------|-------------|-------------|
| <b>Contigs</b>     | 151         | 167         | 140          | 200          | 230         | 149         | 143         |
| <b>Total bases</b> | 120,109,838 | 119,191,266 | 119,730,512  | 120,766,191  | 122,179,079 | 120,316,059 | 120,265,401 |
| <b>N25</b>         | 11,780,999  | 9,748,094   | 9,283,899    | 8,805,940    | 11,196,314  | 13,234,969  | 12,200,080  |
| <b>N50</b>         | 8,166,377   | 4,802,170   | 7,363,394    | 4,757,538    | 9,149,088   | 11,168,341  | 6,996,577   |
| <b>N75</b>         | 4,989,922   | 2,108,767   | 5,593,362    | 1,771,097    | 3,917,708   | 6,074,025   | 2,595,543   |
| <b>N90</b>         | 1,333,704   | 593,800     | 1,975,628    | 657,186      | 949,167     | 804,247     | 1,088,930   |
| <b>L25</b>         | 3           | 3           | 3            | 3            | 3           | 3           | 3           |
| <b>L50</b>         | 6           | 8           | 7            | 8            | 6           | 5           | 6           |
| <b>L75</b>         | 10          | 18          | 11           | 18           | 10          | 9           | 12          |
| <b>L90</b>         | 17          | 34          | 17           | 34           | 19          | 18          | 23          |
| <b>CN50</b>        | 8,166,377   | 4,802,170   | 6,994,145    | 4,757,538    | 9,149,088   | 13,234,969  | 12,200,080  |
| <b>CL50</b>        | 2           | 2           | 2            | 2            | 2           | 1           | 1           |
| <b>NG25</b>        | 11,780,999  | 8,058,848   | 9,238,557    | 7,925,394    | 11,196,314  | 13,234,969  | 12,200,080  |
| <b>NG50</b>        | 7,186,630   | 3,510,498   | 6,994,145    | 4,279,918    | 9,149,088   | 8,759,918   | 5,319,415   |
| <b>NG75</b>        | 2,765,233   | 1,004,113   | 2,403,042    | 1,106,604    | 2,177,877   | 2,307,265   | 1,494,253   |
| <b>NG90</b>        | 0           | 0           | 0            | 0            | 12,670      | 0           | 0           |
| <b>LG25</b>        | 3           | 4           | 4            | 4            | 3           | 3           | 3           |
| <b>LG50</b>        | 7           | 10          | 8            | 10           | 6           | 6           | 7           |
| <b>LG75</b>        | 13          | 26          | 15           | 25           | 13          | 12          | 18          |
| <b>LG90</b>        | 0           | 0           | 0            | 0            | 132         | 0           | 0           |
| <b>Min</b>         | 508         | 86          | 488          | 561          | 474         | 184         | 1,016       |
| <b>Max</b>         | 14,839,891  | 10,639,543  | 12,641,456   | 12,399,038   | 14,879,663  | 14,816,562  | 14,310,783  |

**Supplementary Table 3. Assembly evaluation of collapsed regions.**

| Accession | Number of collapsed regions | Cumulative size (bp) |
|-----------|-----------------------------|----------------------|
| An-1      | 288                         | 187,700              |
| C24       | 178                         | 106,500              |
| Col-0     | 326                         | 508,800              |
| Cvi-0     | 209                         | 211,300              |
| Eri-1     | 144                         | 99,200               |
| Kyo       | 187                         | 115,200              |
| Ler       | 294                         | 260,500              |
| Sha       | 485                         | 507,800              |

**Supplementary Table 4. Assembly validation using genetic maps.**

| Cross         | Assembly tested | Data                              | Markers | Aligned | Conflicts |
|---------------|-----------------|-----------------------------------|---------|---------|-----------|
| Cvi-0 x Col-0 | Cvi-0           | Simon <i>et al.</i> <sup>1</sup>  | 94      | 93      | 0         |
| Ler x Col-0   | Ler             | Singer <i>et al.</i> <sup>2</sup> | 676     | 415     | 3         |
| Ler x Col-0   | Ler             | Giraut <i>et al.</i> <sup>3</sup> | 386     | 357     | 3         |

**Note:** Three genetic maps were used to validate the assemblies of Cvi-0 and Ler. Evaluation of the conflicting markers revealed that all them of were likely caused by structural variations. Each of the conflicting markers was found on contigs which were supported by non-conflicting markers as well.

**Supplementary Table 5. Location of rDNA clusters.**

| Accession | Chr  | Start      | End        | Size   | Unit Count |
|-----------|------|------------|------------|--------|------------|
| An-1      | chr1 | 16,247,697 | 16,249,746 | 2,049  | 5          |
| An-1      | chr2 | 15,160     | 30,883     | 15,723 | 4          |
| An-1      | chr3 | 13,660,309 | 13,693,016 | 32,707 | 44         |
| An-1      | chr4 | 303        | 12,836     | 12,533 | 3          |
| An-1      | chr5 | 11,704,997 | 11,712,070 | 7,073  | 12         |
| An-1      | chr5 | 12,502,040 | 12,517,915 | 15,875 | 41         |
| An-1      | chr5 | 12,528,355 | 12,548,970 | 20,615 | 56         |
| C24       | chr1 | 15,480,421 | 15,481,987 | 1,566  | 4          |
| C24       | chr2 | 5,277      | 9,979      | 4,702  | 3          |
| C24       | chr3 | 14,477,578 | 14,508,366 | 30,788 | 40         |
| C24       | chr4 | 3,024,558  | 3,029,149  | 4,591  | 10         |
| C24       | chr5 | 11,167,024 | 11,173,642 | 6,618  | 11         |
| C24       | chr5 | 12,047,791 | 12,084,720 | 36,929 | 86         |
| Cvi-0     | chr1 | 15,291,551 | 15,293,036 | 1,485  | 1          |
| Cvi-0     | chr1 | 16,201,388 | 16,203,919 | 2,531  | 6          |
| Cvi-0     | chr3 | 13,553,363 | 13,557,056 | 3,693  | 8          |
| Cvi-0     | chr3 | 13,632,106 | 13,672,892 | 40,786 | 50         |
| Cvi-0     | chr3 | 13,693,322 | 13,720,728 | 27,406 | 49         |
| Cvi-0     | chr3 | 14,005,932 | 14,048,548 | 42,616 | 37         |
| Cvi-0     | chr4 | 3,078,679  | 3,107,071  | 28,392 | 57         |
| Cvi-0     | chr5 | 11,309,985 | 11,316,573 | 6,588  | 11         |
| Eri-1     | chr1 | 15,214,182 | 15,216,702 | 2,520  | 6          |
| Eri-1     | chr3 | 14,398,975 | 14,411,194 | 12,219 | 25         |
| Eri-1     | chr3 | 14,944,897 | 14,945,898 | 1,001  | 1          |
| Eri-1     | chr5 | 12,503,702 | 12,518,335 | 14,633 | 37         |
| Eri-1     | chr5 | 12,528,934 | 12,547,045 | 18,111 | 48         |
| Kyo       | chr1 | 15,615,850 | 15,617,896 | 2,046  | 5          |
| Kyo       | chr3 | 14,537,056 | 14,550,096 | 13,040 | 9          |
| Kyo       | chr3 | 15,246,489 | 15,247,490 | 1,001  | 1          |
| Kyo       | chr5 | 11,290,583 | 11,292,705 | 2,122  | 5          |
| Kyo       | chr5 | 11,328,618 | 11,335,208 | 6,590  | 11         |
| Kyo       | chr5 | 12,294,721 | 12,301,528 | 6,807  | 15         |
| Kyo       | chr5 | 12,324,038 | 12,325,865 | 1,827  | 4          |
| Ler       | chr1 | 16,112,353 | 16,114,394 | 2,041  | 5          |
| Ler       | chr2 | 24,660     | 34,941     | 10,281 | 2          |
| Ler       | chr3 | 6,075,317  | 6,076,940  | 1,623  | 4          |
| Ler       | chr3 | 14,214,467 | 14,253,261 | 38,794 | 7          |
| Ler       | chr3 | 14,267,148 | 14,295,446 | 28,298 | 39         |
| Ler       | chr4 | 4,789      | 31,377     | 26,588 | 6          |
| Ler       | chr4 | 3,461,906  | 3,478,278  | 16,372 | 31         |
| Ler       | chr5 | 11,240,780 | 11,255,952 | 15,172 | 31         |
| Ler       | chr5 | 11,317,853 | 11,324,980 | 7,127  | 12         |
| Ler       | chr5 | 12,403,488 | 12,410,158 | 6,670  | 18         |
| Ler       | chr5 | 12,432,957 | 12,436,284 | 3,327  | 7          |
| Sha       | chr1 | 16,317,928 | 16,319,976 | 2,048  | 5          |
| Sha       | chr2 | 4,747      | 17,222     | 12,475 | 3          |
| Sha       | chr3 | 13,328,855 | 13,413,311 | 84,456 | 37         |
| Sha       | chr4 | 1,132      | 27,909     | 26,777 | 5          |
| Sha       | chr4 | 39,104     | 50,775     | 11,671 | 5          |
| Sha       | chr4 | 2,996,768  | 3,020,817  | 24,049 | 48         |
| Sha       | chr5 | 11,301,764 | 11,362,233 | 60,469 | 121        |
| Sha       | chr5 | 12,959,621 | 12,973,107 | 13,486 | 34         |

**Supplementary Table 6. Sequence annotation near assembly gaps.**

| <b>Assembly</b> | <b>Gaps</b> | <b>Pericentromere</b> | <b>rDNA</b> | <b>TE</b> | <b>All</b> |
|-----------------|-------------|-----------------------|-------------|-----------|------------|
| An-1            | 40          | 26                    | 2           | 38        | 95.00%     |
| C24             | 68          | 34                    | 3           | 59        | 86.76%     |
| Cvi-0           | 38          | 25                    | 6           | 35        | 92.11%     |
| Eri-1           | 58          | 22                    | 2           | 49        | 84.48%     |
| Kyo             | 46          | 31                    | 3           | 41        | 89.13%     |
| Ler             | 44          | 27                    | 4           | 41        | 93.18%     |
| Sha             | 49          | 30                    | 5           | 47        | 97.96%     |

**Note:** Assembly gaps can reside in the pericentromere, in or close to ribosomal DNA cluster (distance to the closest rDNA cluster < 5kb) or in or close to transposable elements (distance to closest TE < 500bp). As some of them may simultaneously locate in the pericentromere and rDNA clusters or TEs, the last column indicates the percent of gaps that matched at least one of these features.

**Supplementary Table 7. Assembly evaluation.**

| <b>Accession</b> | <b>Genes without any blastn hit (fully deleted)</b> | <b>Genes without high quality blastn hit (partially deleted)</b> | <b>Percent of genes with good blastn hit</b> | <b>No. of genes without full (&lt;60%) short read coverage</b> |
|------------------|-----------------------------------------------------|------------------------------------------------------------------|----------------------------------------------|----------------------------------------------------------------|
| <b>An-1</b>      | 112                                                 | 75                                                               | 99.3%                                        | 92.5%                                                          |
| <b>C24</b>       | 120                                                 | 88                                                               | 99.2%                                        | 85.6%                                                          |
| <b>Cvi-0</b>     | 136                                                 | 95                                                               | 99.2%                                        | 87.4%                                                          |
| <b>Eri-1</b>     | 102                                                 | 76                                                               | 99.4%                                        | 88.2%                                                          |
| <b>Kyo</b>       | 85                                                  | 79                                                               | 99.4%                                        | 87.8%                                                          |
| <b>Ler</b>       | 107                                                 | 74                                                               | 99.3%                                        | 89.0%                                                          |
| <b>Sha</b>       | 159                                                 | 89                                                               | 99.1%                                        | 75.8%                                                          |

**Note:** To check the assembly completeness, we aligned all 27,445 reference genes against each assembly using blastn. Genes without any blastn hit are fully absent in the assembly (second column). Genes without high-quality blastn hit are only partially present in the assembly (third column). (“High-quality blastn hits” were defined as blastn hits with identity larger than 85 and coverage larger than 95%.)

In order to check if the genes that are absent in the assemblies were just not assembled or were truly missing in the genomes, we further aligned the Illumina whole-genome reads from each accession against Col-0 reference sequence. The last column indicates how many of the genes without blastn hit or good blastn hit have short read alignment coverage in less than 60% of their sequence (and are thus mostly like truly absent in the sequenced genomes).

**Supplementary Table 8. Gene and repeat annotations.**

|                                         | <b>Col-0</b> | <b>An-1</b> | <b>C24</b> | <b>Cvi-0</b> | <b>Eri-1</b> | <b>Kyo</b> | <b>Ler</b> | <b>Sha</b> |
|-----------------------------------------|--------------|-------------|------------|--------------|--------------|------------|------------|------------|
| <b>Protein-coding genes (Araport11)</b> | 27,445       | 27,342      | 27,214     | 27,098       | 27,285       | 27,574     | 27,376     | 27,293     |
| <b>miRNAs</b>                           | 298          | 316         | 301        | 297          | 301          | 313        | 296        | 301        |
| <b>snRNAs</b>                           | 75           | 76          | 78         | 76           | 77           | 77         | 78         | 75         |
| <b>snoRNAs</b>                          | 551          | 602         | 529        | 553          | 571          | 578        | 562        | 580        |
| <b>rRNAs</b>                            | 550          | 501         | 347        | 661          | 387          | 688        | 395        | 1,011      |
| <b>tRNAs</b>                            | 661          | 564         | 545        | 585          | 589          | 561        | 571        | 511        |
| <b>other RNAs</b>                       | 75           | 41          | 43         | 48           | 48           | 43         | 41         | 26         |
| <b>DNA transposons</b>                  | 10,278       | 10,095      | 10,452     | 10,769       | 10,834       | 11,265     | 10,689     | 10,702     |
| <b>retrotransposons</b>                 | 8,598        | 8,797       | 8,493      | 8,724        | 8,601        | 8,790      | 8,570      | 9,072      |
| <b>DNA transposon content</b>           | 4.96%        | 4.79%       | 4.77%      | 4.81%        | 4.99%        | 4.99%      | 4.81%      | 4.78%      |
| <b>retrotransposon content</b>          | 8.28%        | 8.86%       | 8.40%      | 8.23%        | 8.81%        | 8.62%      | 8.50%      | 8.56%      |
| <b>Complete repeat content</b>          | 17.55%       | 17.94%      | 17.42%     | 17.47%       | 18.28%       | 18.57%     | 17.93%     | 18.42%     |

**Note:** The non-coding RNA and repeat annotation were predicted with Infernal and RepeatMasker, respectively.



**Supplementary Table 9. Number and total length of rearranged regions.**

| <b>Accession</b>     | <b>INV</b> | <b>ITX</b> | <b>CTX</b> | <b>DUP-Loss</b> | <b>RefSp.</b> | <b>DUP-Gain</b> | <b>AccSp.</b> |
|----------------------|------------|------------|------------|-----------------|---------------|-----------------|---------------|
| <b><i>Number</i></b> |            |            |            |                 |               |                 |               |
| An-1                 | 33         | 364        | 365        | 2,181           | 5,551         | 2,107           | 5,805         |
| C24                  | 37         | 473        | 508        | 2,423           | 6,305         | 2,207           | 6,455         |
| Cvi-0                | 37         | 566        | 626        | 2,546           | 7,478         | 2,604           | 7,705         |
| Eri-1                | 42         | 410        | 462        | 2,134           | 5,718         | 2,057           | 6,293         |
| Kyo                  | 33         | 368        | 430        | 2,026           | 5,681         | 2,277           | 6,516         |
| Ler                  | 46         | 509        | 485        | 2,409           | 6,085         | 2,470           | 6,509         |
| Sha                  | 37         | 460        | 487        | 2,347           | 6,391         | 2,631           | 6,837         |
| <b><i>Length</i></b> |            |            |            |                 |               |                 |               |
| An-1                 | 1,824,867  | 985,071    | 862,756    | 3,861,135       | 5,320,292     | 3,377,683       | 5,171,246     |
| C24                  | 1,742,898  | 1,367,338  | 1,311,211  | 4,562,135       | 5,929,351     | 3,301,993       | 5,900,176     |
| Cvi-0                | 1,485,583  | 1,657,606  | 1,273,284  | 4,417,754       | 6,345,126     | 4,074,912       | 6,294,286     |
| Eri-1                | 1,709,695  | 975,394    | 1,016,615  | 4,063,236       | 5,405,177     | 3,323,824       | 5,730,514     |
| Kyo                  | 1,559,482  | 988,729    | 1,147,826  | 3,917,699       | 5,056,775     | 3,790,715       | 5,511,508     |
| Ler                  | 1,799,626  | 1,402,826  | 1,102,662  | 4,284,186       | 5,600,844     | 4,005,952       | 5,768,803     |
| Sha                  | 4,214,442  | 1,254,696  | 1,181,706  | 4,408,231       | 6,526,286     | 4,291,496       | 6,018,238     |

**Note:** INV: inversion; ITX: intra-chromosome translocation; CTX: inter-chromosome translocation; DUP-Loss: duplication loss in accession (i.e.: the reference Col-0 has more copies); DUP-Gain: duplication gain in accession (i.e.: the accession has more copies); RefSp: regions specific to the reference genome; AccSp: regions specific to the accession.

**Supplementary Table 10. The percent of genomic rearrangements which reside in or overlap with pericentromeric regions.**

| <b>Genome</b> | <b>INV</b> | <b>ITX</b> | <b>CTX</b> | <b>DUP-Loss</b> | <b>DUP-Gain</b> | <b>Total</b> |
|---------------|------------|------------|------------|-----------------|-----------------|--------------|
| An-1          | 86.2%      | 47.4%      | 41.8%      | 52.3%           | 56.6%           | 52.7%        |
| C24           | 76.0%      | 49.5%      | 45.4%      | 56.7%           | 56.3%           | 54.8%        |
| Cvi-0         | 89.3%      | 51.8%      | 38.4%      | 52.4%           | 56.1%           | 52.2%        |
| Eri-1         | 85.0%      | 48.9%      | 45.6%      | 55.3%           | 55.5%           | 53.7%        |
| Kyo           | 86.6%      | 50.0%      | 47.6%      | 52.3%           | 55.9%           | 53.1%        |
| Ler           | 82.5%      | 59.0%      | 48.1%      | 59.6%           | 62.2%           | 59.4%        |
| Sha           | 61.5%      | 52.7%      | 41.4%      | 54.8%           | 61.3%           | 56.1%        |
| total         | 45.3%      | 51.6%      | 43.8%      | 54.8%           | 57.8%           | 54.6%        |

**Note:** INV: inversion; ITX: intra-chromosome translocation; CTX: inter-chromosome translocation; DUP-Loss: duplication in reference but not in the accession genome; DUP-Gain: duplication in the accession genome but not in the reference genome.

**Supplementary Table 11. Inversions larger than 50kb.**

| <b>Accession</b> | <b>Chr</b> | <b>Start</b> | <b>End</b> | <b>Reference Length</b> | <b>Chr</b> | <b>Start</b> | <b>End</b> | <b>Query Length</b> |
|------------------|------------|--------------|------------|-------------------------|------------|--------------|------------|---------------------|
| An-1             | Chr1       | 14,501,429   | 15,074,096 | 572,667                 | Chr1       | 14,867,422   | 15,215,011 | 347,589             |
| Sha              | Chr1       | 17,660,763   | 17,879,638 | 218,875                 | Chr1       | 17,552,872   | 17,764,136 | 211,264             |
| C24              | Chr1       | 23,188,572   | 23,504,543 | 315,971                 | Chr1       | 22,126,192   | 22,444,978 | 318,786             |
| Ler              | Chr2       | 12,661,878   | 12,731,490 | 69,612                  | Chr2       | 12,361,365   | 12,433,285 | 71,920              |
| Sha              | Chr3       | 2,774,870    | 5,252,859  | 2,477,989               | Chr3       | 2,798,243    | 5,282,580  | 2,484,337           |
| Ler              | Chr3       | 8,295,153    | 8,465,270  | 170,117                 | Chr3       | 8,351,497    | 8,521,688  | 170,191             |
| An-1             | Chr3       | 12,482,569   | 12,618,513 | 135,944                 | Chr3       | 12,419,542   | 12,562,554 | 143,012             |
| An-1             | Chr3       | 13,602,813   | 13,921,313 | 318,500                 | Chr3       | 13,323,011   | 13,379,922 | 56,911              |
| C24              | Chr3       | 13,602,813   | 13,924,434 | 321,621                 | Chr3       | 14,225,825   | 14,285,314 | 59,489              |
| Eri-1            | Chr3       | 13,602,813   | 13,923,880 | 321,067                 | Chr3       | 14,090,720   | 14,163,036 | 72,316              |
| Kyo              | Chr3       | 13,602,813   | 13,921,313 | 318,500                 | Chr3       | 14,288,380   | 14,342,210 | 53,830              |
| Sha              | Chr3       | 14,336,990   | 14,554,838 | 217,848                 | Chr3       | 13,546,260   | 13,785,045 | 238,785             |
| An-1             | Chr4       | 1,612,606    | 2,782,625  | 1,170,019               | Chr4       | 1,652,389    | 2,880,783  | 1,228,394           |
| Cvi-0            | Chr4       | 1,612,606    | 2,782,625  | 1,170,019               | Chr4       | 1,584,780    | 2,849,231  | 1,264,451           |
| Eri-1            | Chr4       | 1,612,606    | 2,782,625  | 1,170,019               | Chr4       | 1,690,889    | 2,870,416  | 1,179,527           |
| Kyo              | Chr4       | 1,612,606    | 2,782,625  | 1,170,019               | Chr4       | 1,666,349    | 2,828,956  | 1,162,607           |
| Ler              | Chr4       | 1,612,606    | 2,782,625  | 1,170,019               | Chr4       | 1,746,529    | 2,898,561  | 1,152,032           |
| Sha              | Chr4       | 1,612,606    | 2,782,625  | 1,170,019               | Chr4       | 1,655,631    | 2,860,573  | 1,204,942           |
| C24              | Chr4       | 1,771,815    | 2,782,625  | 1,010,810               | Chr4       | 1,628,501    | 2,773,489  | 1,144,988           |
| Sha              | Chr4       | 4,356,088    | 4,459,766  | 103,678                 | Chr4       | 4,583,599    | 4,658,107  | 74,508              |
| C24              | Chr4       | 4,572,269    | 4,692,550  | 120,281                 | Chr4       | 5,054,623    | 5,231,295  | 176,672             |
| Eri-1            | Chr4       | 4,572,269    | 4,684,953  | 112,684                 | Chr4       | 4,301,368    | 4,383,248  | 81,880              |
| Kyo              | Chr4       | 4,573,080    | 4,692,550  | 119,470                 | Chr4       | 4,533,759    | 4,689,570  | 155,811             |
| Sha              | Chr5       | 11,730,380   | 11,918,318 | 187,938                 | Chr5       | 11,786,872   | 11,986,397 | 199,525             |
| An-1             | Chr5       | 11,806,527   | 12,002,521 | 195,994                 | Chr5       | 11,646,437   | 11,775,074 | 128,637             |
| An-1             | Chr5       | 12,437,159   | 13,049,679 | 612,520                 | Chr5       | 12,282,399   | 12,909,890 | 627,491             |
| Eri-1            | Chr5       | 12,437,159   | 13,049,679 | 612,520                 | Chr5       | 12,323,868   | 12,905,576 | 581,708             |
| Kyo              | Chr5       | 12,437,159   | 12,989,685 | 552,526                 | Chr5       | 12,188,346   | 12,650,586 | 462,240             |
| Sha              | Chr5       | 12,437,159   | 12,989,685 | 552,526                 | Chr5       | 12,846,278   | 13,225,872 | 379,594             |
| C24              | Chr5       | 12,477,370   | 13,049,679 | 572,309                 | Chr5       | 11,887,516   | 12,455,714 | 568,198             |
| Cvi-0            | Chr5       | 12,539,575   | 13,049,679 | 510,104                 | Chr5       | 12,289,995   | 12,635,489 | 345,494             |
| Ler              | Chr5       | 12,592,489   | 12,989,685 | 397,196                 | Chr5       | 12,316,710   | 12,555,454 | 238,744             |
| Ler              | Chr5       | 13,050,974   | 13,284,321 | 233,347                 | Chr5       | 12,555,453   | 12,810,352 | 254,899             |

**Supplementary Table 12. Number and total length of local sequence variation in syntenic and rearranged regions.**

| <b>Accession</b>     | <b>Region</b> | <b>SNP</b> | <b>S-Indel</b> | <b>L-Indel</b> | <b>HDR</b> | <b>CPG</b> | <b>CPL</b> |
|----------------------|---------------|------------|----------------|----------------|------------|------------|------------|
| <b><i>Number</i></b> |               |            |                |                |            |            |            |
| An-1                 | SYN           | 637,248    | 150,172        | 1,372          | 1,582      | 400        | 400        |
| An-1                 | GR            | 81,377     | 9,591          | 70             | 48         | 58         | 41         |
| C24                  | SYN           | 720,846    | 168,230        | 1,604          | 1,690      | 464        | 441        |
| C24                  | GR            | 103,207    | 12,332         | 95             | 62         | 60         | 56         |
| Cvi-0                | SYN           | 892,125    | 209,003        | 1,851          | 2,282      | 522        | 541        |
| Cvi-0                | GR            | 114,058    | 13,430         | 95             | 83         | 61         | 56         |
| Eri-1                | SYN           | 682,249    | 159,143        | 1,438          | 1,582      | 441        | 439        |
| Eri-1                | GR            | 84,278     | 9,696          | 73             | 53         | 55         | 50         |
| Kyo                  | SYN           | 691,263    | 159,418        | 1,499          | 1,667      | 433        | 459        |
| Kyo                  | GR            | 81,309     | 9,896          | 77             | 58         | 48         | 52         |
| Ler                  | SYN           | 693,354    | 161,088        | 1,439          | 1,687      | 447        | 467        |
| Ler                  | GR            | 102,048    | 11,952         | 83             | 56         | 52         | 53         |
| Sha                  | SYN           | 727,954    | 170,344        | 1,533          | 1,793      | 465        | 491        |
| Sha                  | GR            | 114,816    | 15,077         | 108            | 82         | 66         | 70         |
| <b><i>Length</i></b> |               |            |                |                |            |            |            |
| An-1                 | SYN           | 637,248    | 532,662        | 538,146        | 953,561    | 367,053    | 341,470    |
| An-1                 | GR            | 81,377     | 33,006         | 26,918         | 26,336     | 158,342    | 106,342    |
| C24                  | SYN           | 720,846    | 602,294        | 653,268        | 1,081,456  | 463,818    | 403,270    |
| C24                  | GR            | 103,207    | 41,370         | 20,938         | 44,956     | 288,835    | 150,235    |
| Cvi-0                | SYN           | 892,125    | 742,298        | 723,616        | 1,556,755  | 551,227    | 492,673    |
| Cvi-0                | GR            | 114,058    | 45,222         | 27,663         | 49,091     | 154,123    | 121,634    |
| Eri-1                | SYN           | 682,249    | 570,014        | 566,821        | 972,935    | 393,342    | 469,857    |
| Eri-1                | GR            | 84,278     | 32,141         | 27,734         | 27,278     | 139,160    | 209,105    |
| Kyo                  | SYN           | 691,263    | 567,521        | 585,439        | 986,372    | 366,991    | 522,942    |
| Kyo                  | GR            | 81,309     | 33,208         | 29,441         | 54,438     | 132,861    | 162,146    |
| Ler                  | SYN           | 693,354    | 571,606        | 558,989        | 946,557    | 489,357    | 481,803    |
| Ler                  | GR            | 102,048    | 40,617         | 22,175         | 38,796     | 120,753    | 224,427    |
| Sha                  | SYN           | 727,954    | 609,894        | 606,149        | 1,162,736  | 475,067    | 533,052    |
| Sha                  | GR            | 114,816    | 51,339         | 41,818         | 40,173     | 144,841    | 202,717    |

**Note:** SYN: syntenic regions; GR: rearranged regions including inversion, translocation and duplications; S-Indel: short indels; L-Indel: long indels; HDR: highly divergent regions; CPG: copy gain variation; CPL: copy-loss variation

**Supplementary Table 13. Gene family contraction and expansion between Col-0 and each of the other seven genomes.**

| Acc.  | NvN    | 1v2 | 2v1 | 1v3 | 3v1 | 2v3 | 3v2 | Ref>Qry | Qry>Ref | ColSp |
|-------|--------|-----|-----|-----|-----|-----|-----|---------|---------|-------|
| An-1  | 25,561 | 155 | 330 | 12  | 36  | 46  | 138 | 358     | 131     | 678   |
| C24   | 25,228 | 185 | 402 | 13  | 81  | 72  | 168 | 450     | 147     | 699   |
| Cvi-0 | 25,019 | 151 | 444 | 16  | 84  | 100 | 207 | 452     | 149     | 823   |
| Eri-1 | 25,379 | 175 | 378 | 17  | 63  | 62  | 120 | 397     | 154     | 704   |
| Kyo   | 25,556 | 168 | 358 | 19  | 45  | 56  | 147 | 381     | 102     | 613   |
| Ler   | 25,399 | 164 | 388 | 14  | 84  | 72  | 144 | 381     | 135     | 665   |
| Sha   | 25,184 | 163 | 394 | 14  | 78  | 74  | 159 | 448     | 139     | 792   |

**Note:** Gene copy number variation between Col-0 and each of other accessions based on gene family clustering. Acc.: accessions; NvN: both the Col-0 and the query genomes have the same number of genes in the respective gene families. 1v2, 2v1, 1v3, 3v1, 2v3, 3v2 indicate the corresponding number of Col-0 genes and accession genes in a gene family. “Ref>Qry” and “Qry>Ref” refer to the number of Col-0 genes in cases where either the reference or a divergent accession has more genes (>3) in a particular gene family. ColSp: genes present in the reference Col-0 genome but absent in the accession genome.

**Supplementary Table 14. Non-reference genes.**

| <b>Acc.</b> | <b>Novel</b> | <b>Novel2</b> | <b>AccSp</b> | <b><i>A. lyrata</i><br/>ortholog</b> | <b>RNA-seq<br/>support</b> |
|-------------|--------------|---------------|--------------|--------------------------------------|----------------------------|
| An-1        | 539          | 403           | 136          | 166                                  | 164                        |
| C24         | 590          | 406           | 184          | 198                                  | 236                        |
| Cvi-0       | 598          | 384           | 214          | 175                                  | 179                        |
| Eri-1       | 537          | 416           | 121          | 171                                  | n/a                        |
| Kyo         | 533          | 411           | 122          | 177                                  | n/a                        |
| Ler         | 555          | 420           | 135          | 172                                  | 270                        |
| Sha         | 551          | 413           | 138          | 173                                  | 146                        |
| Total       | 1,941        | 891           | 1,050        | 452                                  |                            |

**Note:** The values in the “Total” row depict the numbers of gene families of the genes in the individual accessions (i.e. the non-redundant gene numbers). Novel2: genes shared by at least two accessions. AccSp: genes specific to an accession. n/a: no RNA-seq data available for these genomes.



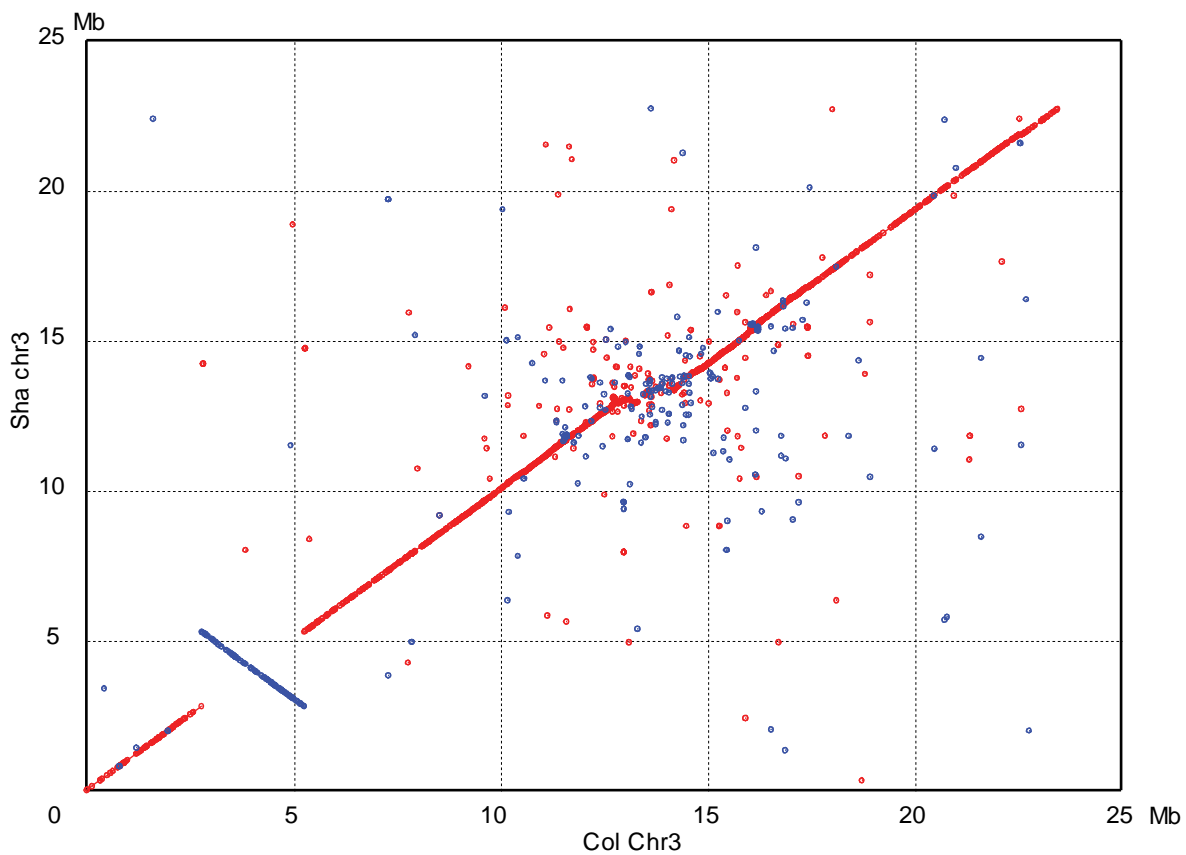

**Supplementary Figure 1. A 2.48Mb inversion between the Col-0 reference and the Sha assembly.**

The alignment was performed with nucmer with the parameter setting “-mum -c 40 -b 90 -l 100 -b 200”. The plot was drawn using MUMmerplot <sup>29</sup>. Red: forward alignments, Blue: reverse alignments. Source Data are provided as a Source Data file.



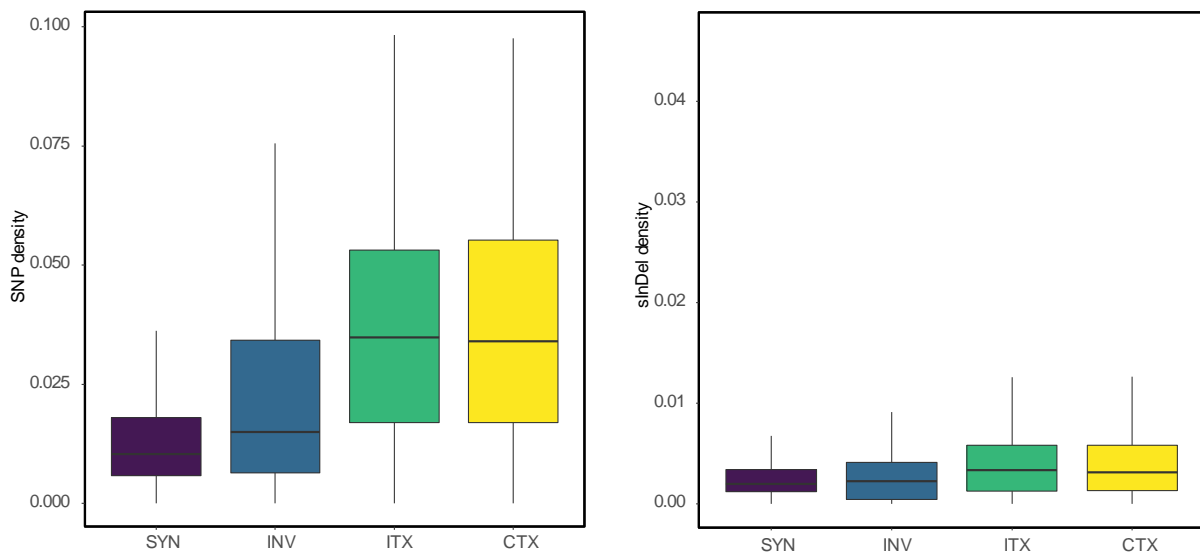

**Supplementary Figure 2. Sequence variation density per bp in syntenic and rearranged regions.**

Variations include SNPs and small InDels. Syntenic regions (SYN) number:  $n = 18,785$ ; Inversion (INV) number:  $n = 3,350$ ; intra-chromosome translocation (ITX) number:  $n = 3,150$ ; inter-chromosome translocation (CTX) number:  $n = 3,363$ . In box plots, centre line: median, bounds of box: 25<sup>th</sup> and 75<sup>th</sup> percentiles, whiskers:  $1.5 * \text{IQR}$  (IQR: the interquartile range between the 25<sup>th</sup> and the 75<sup>th</sup> percentile). Source Data are provided as a Source Data file.

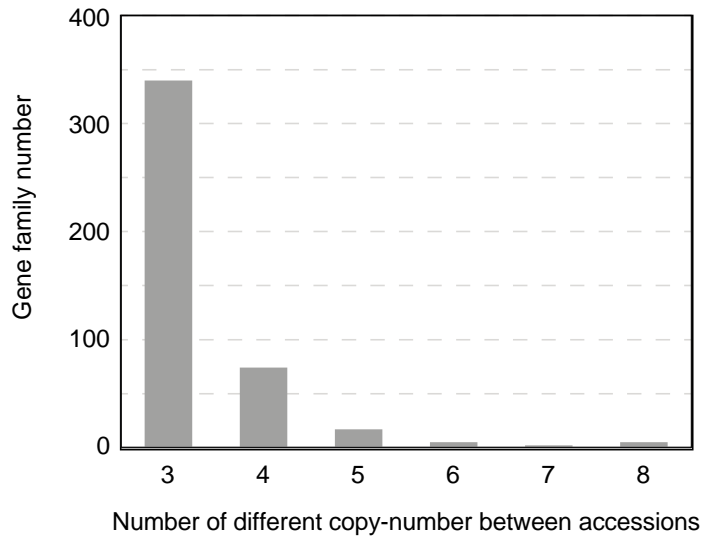

**Supplementary Figure 3. Gene families with multiple different copy numbers across the eight accessions.**

Source Data are provided as a Source Data file.

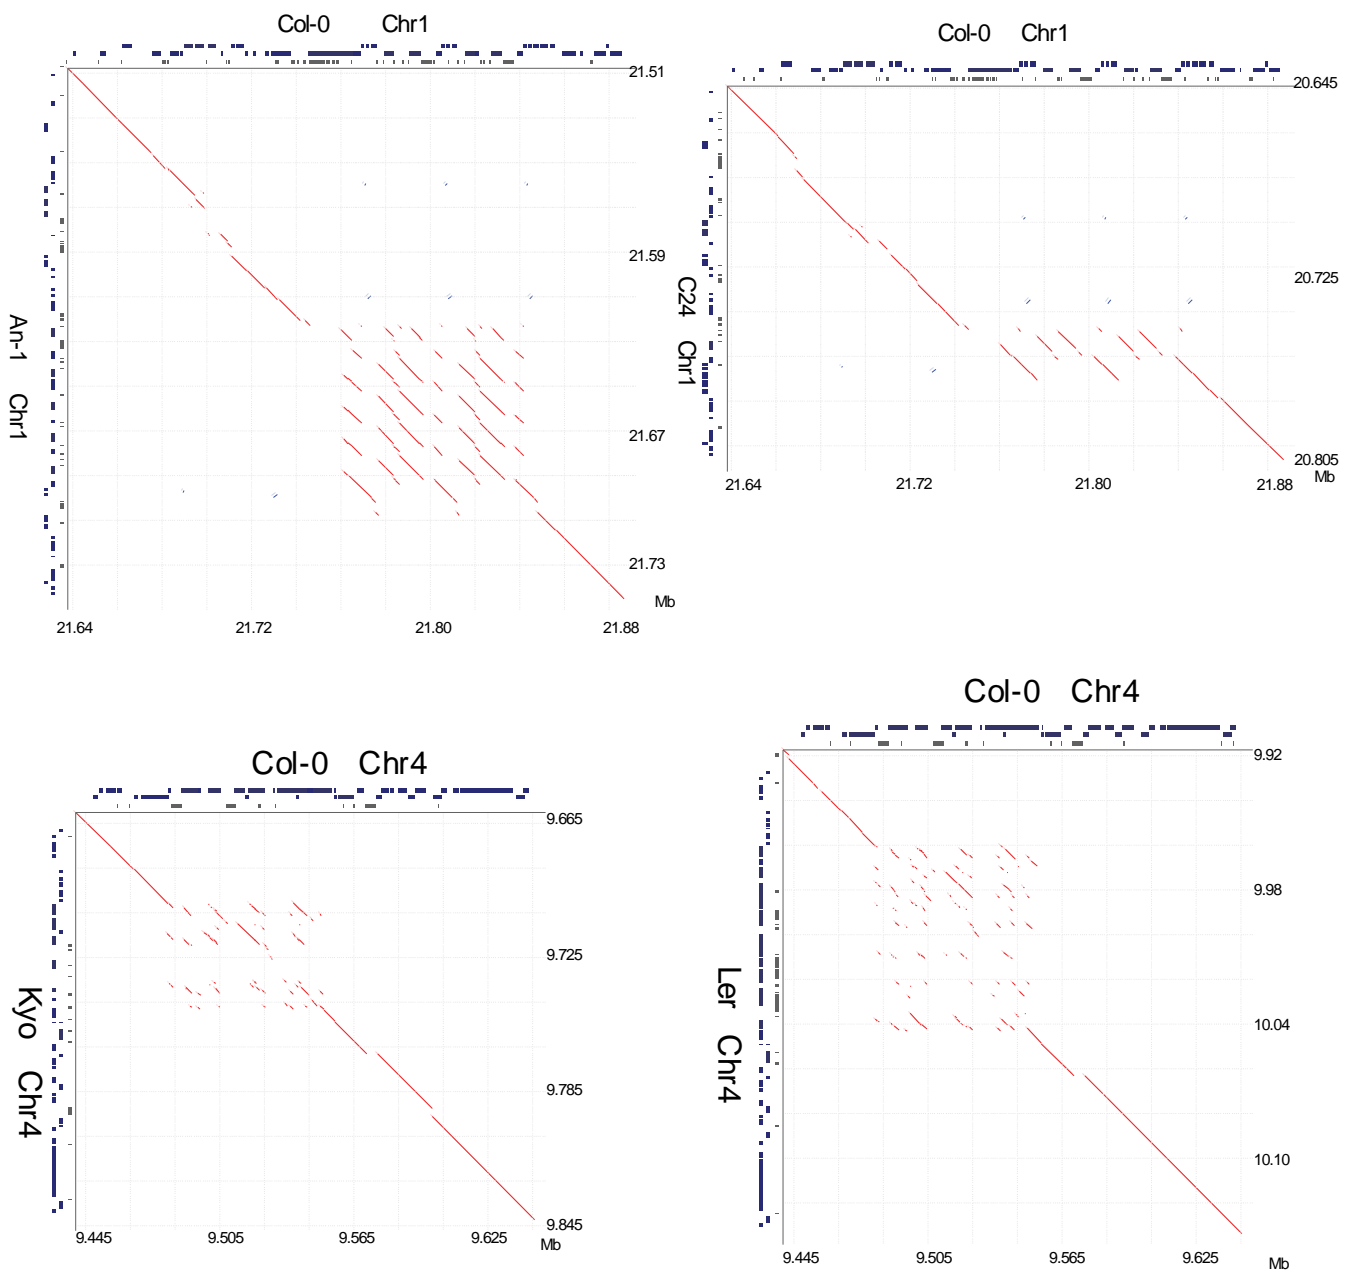

**Supplementary Figure 4. Examples of sequence alignment dot plots of four hotspots of rearrangements.**

The three rows on top and the three columns on the right show the location of genes on the forward strand (top), on the reverse strand (middle) and the repeat regions (bottom). Red line: forward alignment, blue line: reverse alignment. Source Data are provided as a Source Data file.

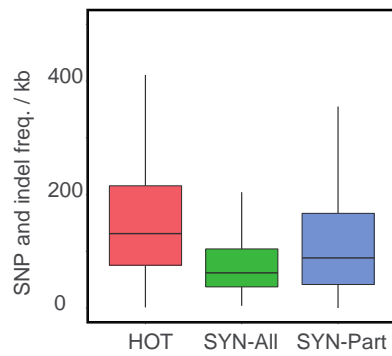

**Supplementary Figure 5. Small variation frequency in three genomic regions.**

The three genomic regions include HOT, SYN-All and SYN-Part. The small sequence variation was identified based on the whole genome alignments between each of seven accessions and Col-0 reference genome. HOT: regions with synteny diversity values of larger than 0.5, n = 576; SYN-All: regions which are syntenic in all pairwise comparisons (synteny diversity = 0), n = 10,331; SYN-Part: partially syntenic regions, including all regions remaining after excluding SYN-All and HOT regions, n = 10,501. In box plots, centre line: median, bounds of box: 25<sup>th</sup> and 75<sup>th</sup> percentiles, whiskers: 1.5 \* IQR (IQR: the interquartile range between the 25<sup>th</sup> and the 75<sup>th</sup> percentile). Source Data are provided as a Source Data file.

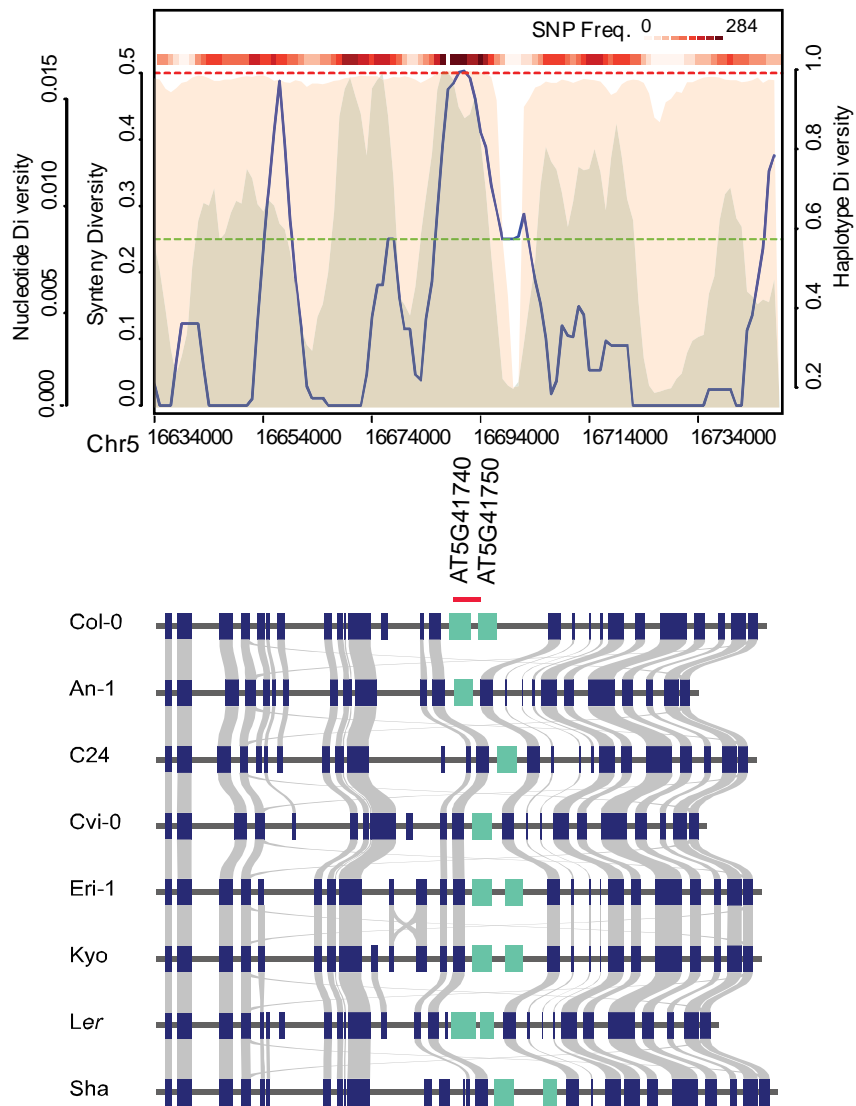

**Supplementary Figure 6. Gene arrangements and variation analyses in the *Dangerous Mix 1* locus.**

Variation analyses include synteny, nucleotide, and haplotype diversity analyses. *Dangerous Mix 1* (*DM1*) contains two tandem duplicated genes AT5G41740 and AT5G41750<sup>30</sup>. One HOT region (shown by a red line above Col-0 genes) overlaps with *DM1*. Source Data are provided as a Source Data file.

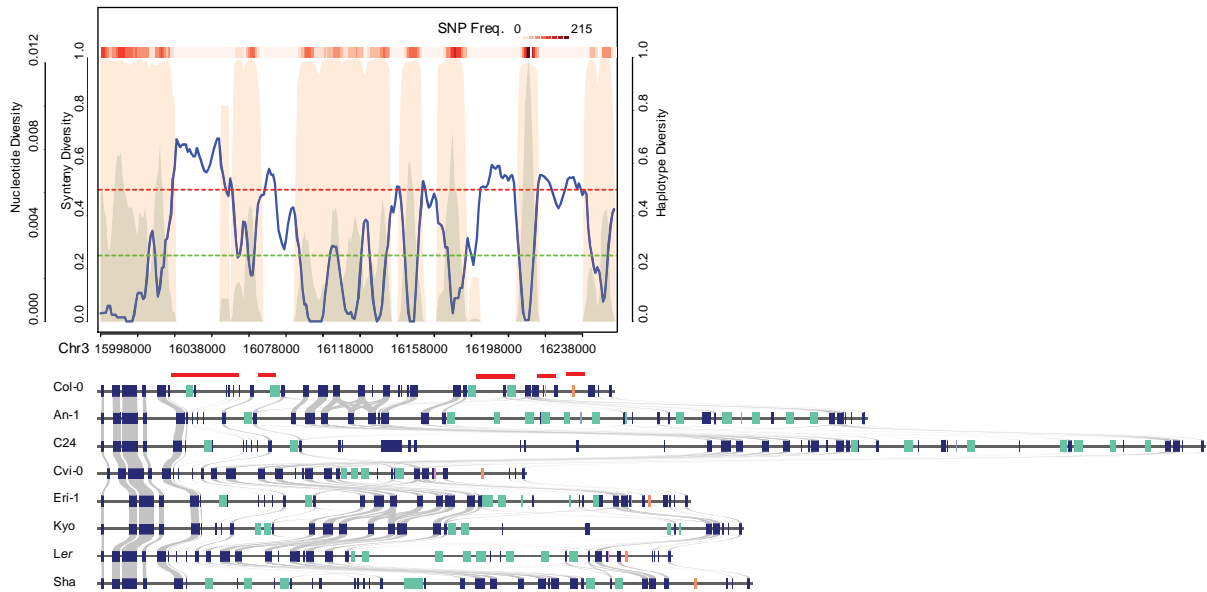

**Supplementary Figure 7. Gene arrangements and variation analyses in the *Dangerous Mix 2* locus.**

Variation analyses include synteny, nucleotide, and haplotype diversity analyses. *Dangerous Mix 2* (*DM2*) was mapped to chromosome 3:16.15 - 16.30 Mb<sup>31</sup>. Several HOT regions (shown by red lines above Col-0 genes) are in or around this locus. Source Data are provided as a Source Data file.

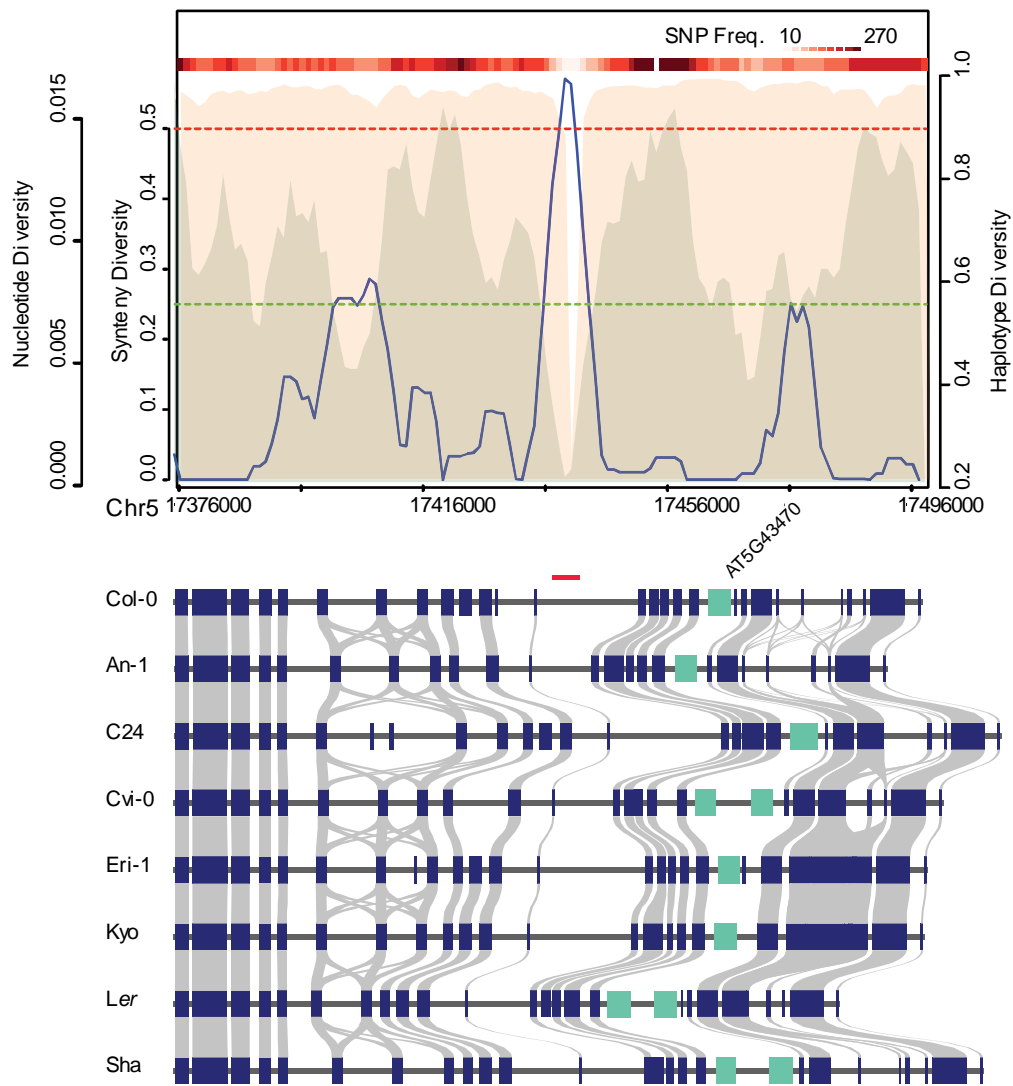

**Supplementary Figure 8. Gene arrangements and variation analyses in the *Dangerous Mix 4* locus.**

Variation analyses include synteny, nucleotide, and haplotype diversity analyses. *Dangerous Mix 4* (*DM4*) locus was mapped to chromosome 5:17.16 - 17.50 Mb<sup>31</sup>. One HOT region (shown by a red line above Col-0 genes) is in this locus. Source Data are provided as a Source Data file.

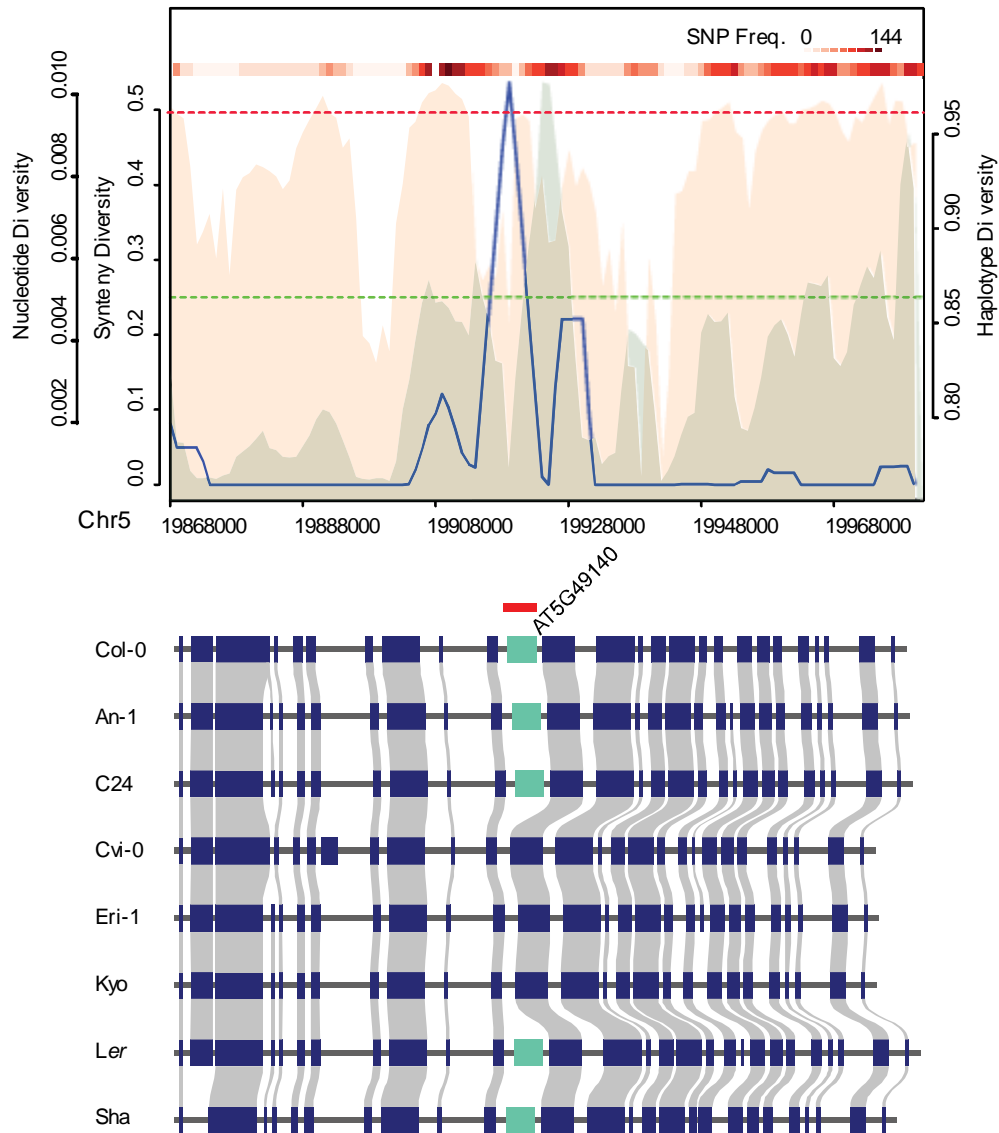

**Supplementary Figure 9. Gene arrangements and variation analyses in the *Dangerous Mix 5* locus.**

Variation analyses include synteny, nucleotide, and haplotype diversity analyses. *Dangerous Mix 5 (DM5)* locus was mapped to chromosome 5:19.89 - 20.48 Mb<sup>31</sup>. One HOT region (shown by red line above Col-0 genes) is in this locus. Source Data are provided as a Source Data file.



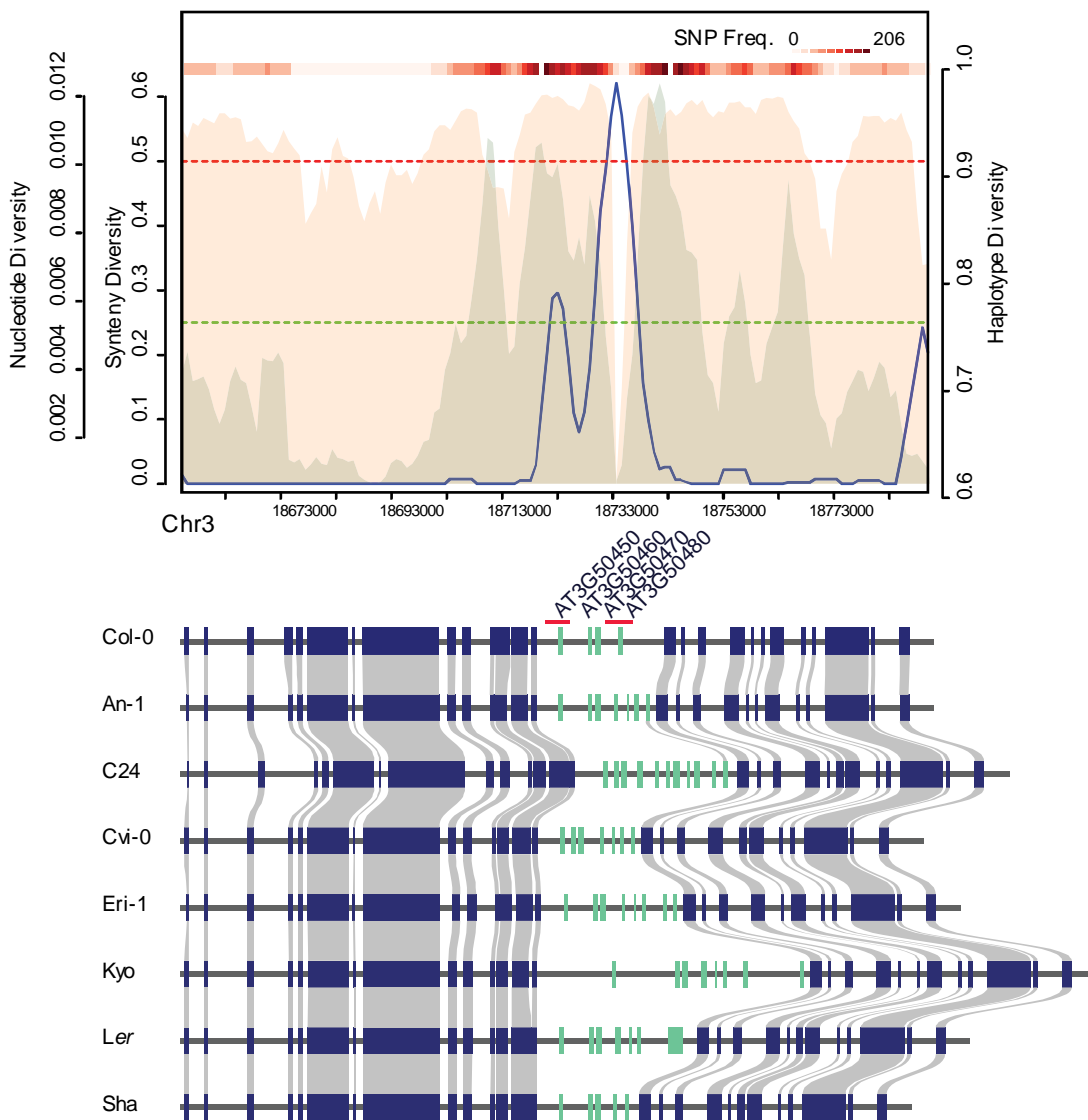

**Supplementary Figure 10. Gene arrangements and variation analyses in the *Dangerous Mix 7* locus.**

Variation analyses include synteny, nucleotide, and haplotype diversity analyses. *Dangerous Mix 7 (DM7)* locus was mapped to two intervals on chromosome 3:18.53 – 18.99 Mb and 18.58-18.93 Mb<sup>31</sup>. Two HOT regions (shown by red lines above Col-0 genes) overlapped with this interval and the R gene cluster *RPW8.1/ RPW8.2*. Source Data are provided as a Source Data file.

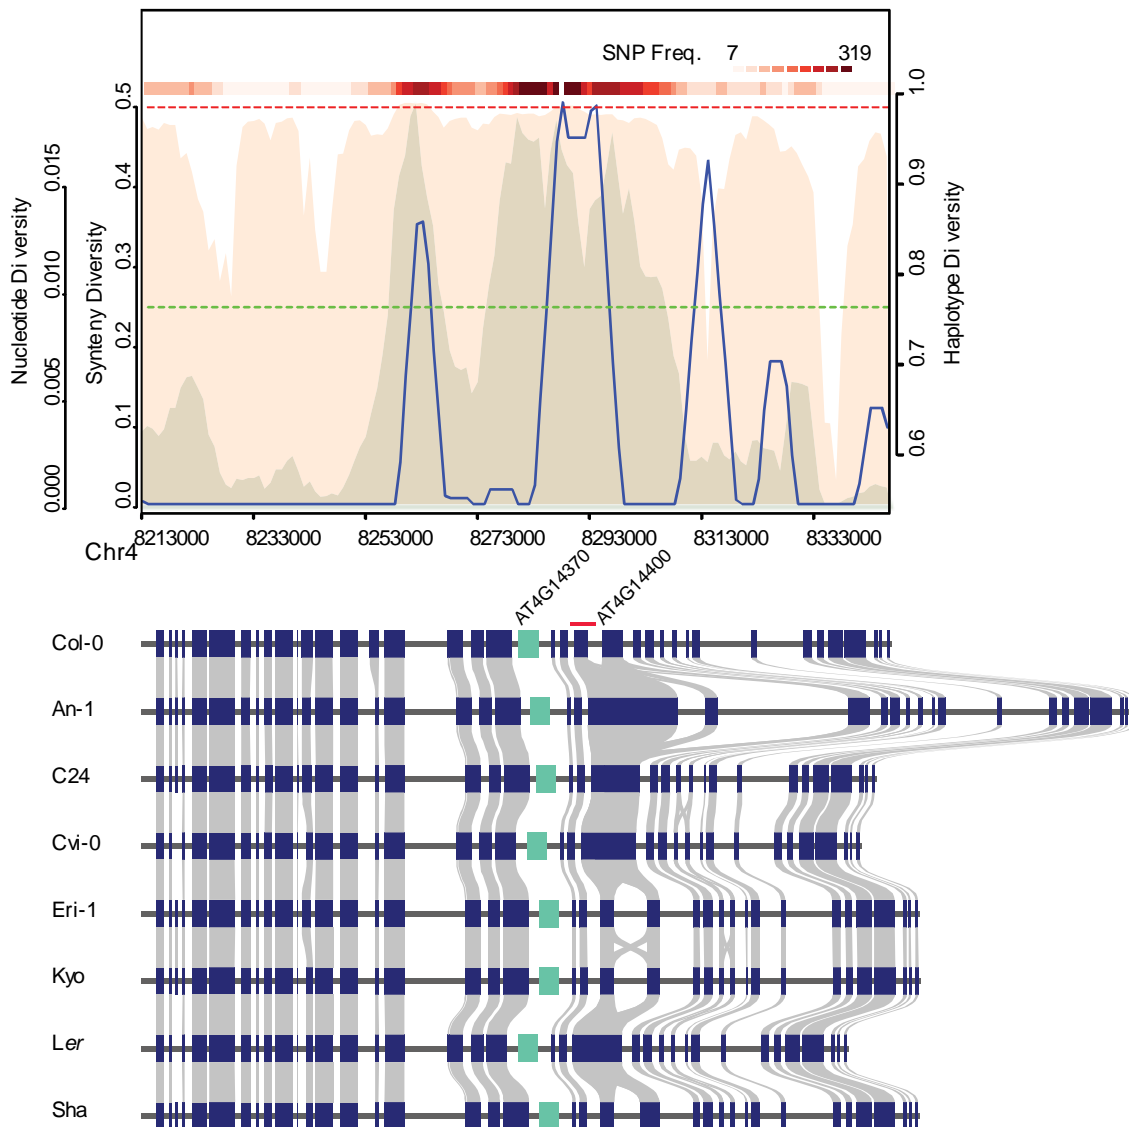

**Supplementary Figure 11. Gene arrangements and variation analyses in the *Dangerous Mix 9* locus.**

Variation analyses include synteny, nucleotide, and haplotype diversity analyses. A small HOT region (shown by a red line above Col-0 genes) overlaps with the *Dangerous Mix 9* (*DM9*) *ACD6* allele (AT4G14400)<sup>32</sup>. Source Data are provided as a Source Data file.

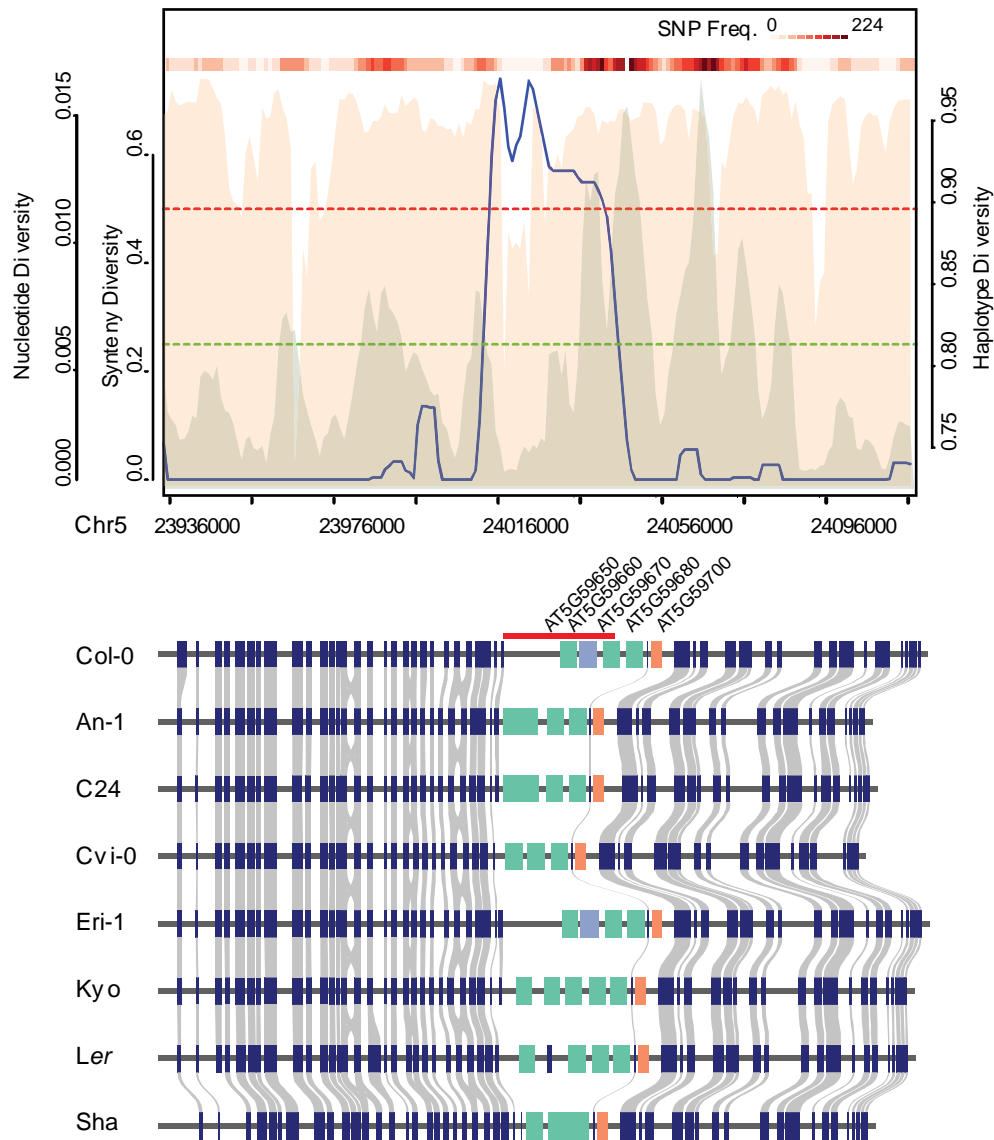

**Supplementary Figure 12. Gene arrangements and variation analyses in the single-locus genetic incompatibility locus of the OAK gene.**

Variation analyses include synteny, nucleotide, and haplotype diversity analyses. A large HET region (shown by a red line above Col-0 genes) overlaps with the *OAK* gene including four receptor-like kinases (AT5G59650 to AT5G59680)<sup>33</sup>. Source Data are provided as a Source Data file.

## Supplementary References

1. Simon, M. *et al.* Quantitative trait loci mapping in five new large recombinant inbred line populations of *Arabidopsis thaliana* genotyped with consensus single-nucleotide polymorphism markers. *Genetics* **178**, 2253-2264 (2008).
2. Singer, T. *et al.* A high-resolution map of *Arabidopsis* recombinant inbred lines by whole-genome exon array hybridization. *PLoS Genet.* **2**, e144 (2006).
3. Giraut, L. *et al.* Genome-wide crossover distribution in *Arabidopsis thaliana* meiosis reveals sex-specific patterns along chromosomes. *PLoS Genet.* **7**, e1002354 (2011).
4. Clauw, P. *et al.* Leaf responses to mild drought stress in natural variants of *Arabidopsis*. *Plant Physiol.* **167**, 800-816 (2015).
5. Clauw, P. *et al.* Leaf growth response to mild drought: natural variation in *Arabidopsis* sheds light on trait architecture. *Plant Cell* **28**, 2417-2434 (2016).
6. Van Veen, H. *et al.* Transcriptomes of eight *Arabidopsis thaliana* accessions reveal core conserved, genotype- and organ-specific responses to flooding stress. *Plant Physiology* **172**, 668-689 (2016).
7. Cui, P., Zhang, S., Ding, F., Ali, S. & Xiong, L. Dynamic regulation of genome-wide pre-mRNA splicing and stress tolerance by the Sm-like protein LSM5 in *Arabidopsis*. *Genome Biol.* **15**, R1 (2014).
8. Miller, M., Song, Q., Shi, X., Juenger, T. E. & Chen, Z. J. Natural variation in timing of stress-responsive gene expression predicts heterosis in intraspecific hybrids of *Arabidopsis*. *Nat. Commun.* **6**, 7453 (2015).
9. Ding, F. *et al.* Genome-wide analysis of alternative splicing of pre-mRNA under salt stress in *Arabidopsis*. *BMC Genomics* **15**, 431 (2014).
10. Zhao, Y. *et al.* *REPRESSOR OF SILENCING5* encodes a member of the small heat shock protein family and is required for DNA demethylation in *Arabidopsis*. *Plant Cell* **26**, 2660-2675 (2014).
11. Perez-Santángelo, S. *et al.* Role for LSM genes in the regulation of circadian rhythms. *Proc. Natl. Acad. Sci.* **111**, 15166-15171 (2014).
12. Xu, E. *et al.* Quantitative trait loci mapping and transcriptome analysis reveal candidate genes regulating the response to ozone in *Arabidopsis thaliana*. *Plant, Cell Environ.* **38**, 1418-1433 (2015).
13. Cui, P. *et al.* The RNA polymerase II C-terminal domain phosphatase-like protein FIERY2/CPL1 interacts with eIF4AIII and is essential for nonsense-mediated mRNA decay in *Arabidopsis*. *Plant Cell* **28**, 770-85 (2016).
14. Du, J. L. *et al.* The splicing factor PRP31 is Involved in transcriptional gene silencing and stress response in *Arabidopsis*. *Mol. Plant* **8**, 1053-1068 (2015).

15. Groszmann, M. *et al.* Hormone-regulated defense and stress response networks contribute to heterosis in *Arabidopsis* F1 hybrids . *Proc. Natl. Acad. Sci.* **112**, E6397-E6406 (2015).
16. Wang, L. *et al.* Hybrid mimics and hybrid vigor in *Arabidopsis* . *Proc. Natl. Acad. Sci.* **112**, E4959-E4967 (2015).
17. Piofczyk, T., Jeena, G. & Pecinka, A. *Arabidopsis thaliana* natural variation reveals connections between UV radiation stress and plant pathogen-like defense responses. *Plant Physiol. Biochem.* **93**, 34-43 (2015).
18. Zhang, Q. *et al.* The chromatin remodeler DDM1 promotes hybrid vigor by regulating salicylic acid metabolism. *Cell Discov.* **2**, 16027 (2016).
19. Kawakatsu, T. *et al.* Epigenomic diversity in a global collection of *Arabidopsis thaliana* accessions. *Cell* **166**, 492–505 (2016).
20. Wang, L. *et al.* PIF4-controlled auxin pathway contributes to hybrid vigor in *Arabidopsis thaliana*. *Proc. Natl. Acad. Sci.* **114**, E3555-E3562 (2017).
21. Leydon, A. R. *et al.* The molecular dialog between flowering plant reproductive partners defined by SNP-informed RNA-sequencing. *Plant Cell* **29**, 984-1006 (2017).
22. Picard, C. L. & Gehring, M. Proximal methylation features associated with nonrandom changes in gene body methylation. *Genome Biol.* **18**, 73 (2017).
23. Li, Q., Li, Y., Moose, S. P. & Hudson, M. E. Transposable elements, mRNA expression level and strand-specificity of small RNAs are associated with non-additive inheritance of gene expression in hybrid plants. *BMC Plant Biol.* **15**, 168 (2015).
24. Li, D. *et al.* FAR-RED ELONGATED HYPOCOTYL3 activates SEPALLATA2 but inhibits CLAVATA3 to regulate meristem determinacy and maintenance in *Arabidopsis*. *Proc. Natl. Acad. Sci.* **113**, 9375-9380 (2016).
25. Wuest, S. E., Philipp, M. A., Guthörl, D., Schmid, B. & Grossniklaus, U. Seed production affects maternal growth and senescence in *Arabidopsis*. *Plant Physiol.* **171**, 392-404 (2016).
26. Huang, Z. *et al.* APETALA2 antagonizes the transcriptional activity of AGAMOUS in regulating floral stem cells in *Arabidopsis thaliana*. *New Phytol.* **215**, 1197-1209 (2017).
27. Ezer, D. *et al.* The G-box transcriptional regulatory code in *Arabidopsis*. *Plant Physiol.* **175**, 628-640 (2017).
28. Lei, L., Steffen, J. G., Osborne, E. J. & Toomajian, C. Plant organ evolution revealed by phylotranscriptomics in *Arabidopsis thaliana*. *Sci. Rep.* **7**, 7567 (2017).
29. Marçais, G. *et al.* MUMmer4: a fast and versatile genome alignment system. *PLoS Comput. Biol.* **14**, e1005944 (2018).

30. Bomblies, K. *et al.* Autoimmune response as a mechanism for a Dobzhansky-Muller-type incompatibility syndrome in plants. *PLoS Biol.* **5**, 1962–1972 (2007).
31. Chae, E. *et al.* Species-wide genetic incompatibility analysis identifies immune genes as hot spots of deleterious epistasis. *Cell* **159**, 1341–1351 (2014).
32. Todesco, M. *et al.* Activation of the *Arabidopsis thaliana* immune system by combinations of common *ACD6* alleles. *PLoS Genet.* **10**, e1004459 (2014).
33. Smith, L. M., Bomblies, K. & Weigel, D. Complex evolutionary events at a tandem cluster of *Arabidopsis thaliana* genes resulting in a single-locus genetic incompatibility. *PLoS Genet.* **7**, e1002164 (2011).
