# Supplementary material for: Chromosome-level assemblies of multiple Arabidopsis genomes reveal hotspots of rearrangements with altered evolutionary dynamics
Source: PubMed Central journal article supplement (PMC7033125; doi:10.1038/s41467-020-14779-y), 2020-02-20
Supplement: 41467_2020_14779_MOESM4_ESM.pdf [file 41467_2020_14779_MOESM4_ESM.pdf]

### **Description of Additional Supplementary Files**

File Name: Supplementary Data 1

Description: Location of centromeric and telomeric tandem repeat arrays

File Name: Supplementary Data 2

Description: RNA-seq data used for gene annotations

File Name: Supplementary Data 3

Description: List of HOT regions
